# Supplementary material
Source: publisher figshare collection journal article supplement (https://frontiersin.figshare.com/ndownloader/files/15111509)
Supplement: Supplementary file [file 15111509]

## *Supplementary Material*

### **Roles of CpcF and CpcG1 in Peroxiredoxin-Mediated Oxidative Stress Responses and Cellular Fitness in the Cyanobacterium *Synechocystis* sp. PCC 6803**

Running Head: PBS regulation & cellular stress in cyanobacteria

Sookyung Oh<sup>1</sup> and Beronda L. Montgomery<sup>1,2,3\*</sup>

<sup>1</sup>Department of Energy – Plant Research Laboratory, Michigan State University, East Lansing, MI 48824, USA

<sup>2</sup>Department of Biochemistry and Molecular Biology, Michigan State University, East Lansing, MI 48824, USA

<sup>3</sup>Department of Microbiology & Molecular Genetics, Michigan State University, East Lansing, MI 48824, USA.

\*For correspondence: E-mail: [montg133@msu.edu](mailto:montg133@msu.edu)

## Supplemental Table 1. Primer sequences

| Primer ID        | Primer sequence                        | Purpose                                                             |
|------------------|----------------------------------------|---------------------------------------------------------------------|
| F1- <i>CPCF</i>  | GTTTACCCCTTTAGCCGCATTGAT               | Deletion of <i>cpcF</i>                                             |
| R1- <i>CPCF</i>  | CCCGTTGAATATGGCTCATGGTTTAGCCCCTG       | Deletion of <i>cpcF</i>                                             |
| F2- <i>CPCF</i>  | GATGCTCGATGAGTTTTTCTAAGCTTTTAGAGCACCTC | Deletion of <i>cpcF</i>                                             |
| R2- <i>CPCF</i>  | GGGAGCCAAGCTAGAATCAATG                 | Deletion of <i>cpcF</i>                                             |
| F3- <i>CPCF</i>  | CAGGGGCTAAACCATGAGCCATATTCAACGGG       | Deletion of <i>cpcF</i> , Confirmation of deletion of <i>cpcF</i>   |
| R3- <i>CPCF</i>  | GAGGTGCTCTAAAAGCTTAGAAAACTCATCGAGCATC  | Deletion of <i>cpcF</i> , Confirmation of deletion of <i>cpcF</i>   |
| F- <i>CPCF</i>   | TCTTGTCTCTCTGGGGTAGG                   | Confirmation of deletion of <i>cpcF</i>                             |
| R- <i>CPCF</i>   | AGACTCGGCAGCCAAATTAGT                  | Confirmation of deletion of <i>cpcF</i>                             |
| F1- <i>CPCG1</i> | GATTTTTATTACCTGCTGGGGGAAG              | Deletion of <i>cpcG1</i>                                            |
| R1- <i>CPCG1</i> | CCCGTTGAATATGGCTCATGTGTAAACCTCCG       | Deletion of <i>cpcG1</i>                                            |
| F2- <i>CPCG1</i> | GATGCTCGATGAGTTTTTCTAAGCACTAAGGTCAGAG  | Deletion of <i>cpcG1</i>                                            |
| R2- <i>CPCG1</i> | GCCAAACAACGCCATAATCACTAA               | Deletion of <i>cpcG1</i>                                            |
| F3- <i>CPCG1</i> | CGGAGGTTTACACATGAGCCATATTCAACGGG       | Deletion of <i>cpcG1</i> , Confirmation of deletion of <i>cpcG1</i> |
| R3- <i>CPCG1</i> | CTCTGACCTTAGTGCTTAGAAAACTCATCGAGCATC   | Deletion of <i>cpcG1</i> , Confirmation of deletion of <i>cpcG1</i> |
| F- <i>CPCG1</i>  | CTCCAGCAGCGATATGGATAA                  | Confirmation of deletion of <i>cpcG1</i>                            |
| R- <i>CPCG1</i>  | GTACCGGGGAGATTTGATGTT                  | Confirmation of deletion of <i>cpcG1</i>                            |

**Supplemental Figure 1.** Accumulation of OCP protein in WT and phycobilisome-deficient  $\Delta cpcF$  and  $\Delta cpcG1$  strains. Immunoblot analysis was performed using anti-OCP antibody (top panel) or anti-RbcL antibody (bottom panel), with representative blots shown. Total soluble proteins were extracted from wild-type (WT),  $\Delta cpcF$  and  $\Delta cpcG1$  strains (two independent mutant strains for each  $\Delta cpcF$  and  $\Delta cpcG1$  included, as well as a  $\Delta cpcG1$  strain that is segregating [seg.] a WT *cpcG1* gene and, thus, is similar to WT) grown under  $10 \mu\text{mol m}^{-2} \text{s}^{-1}$  for 5 days or 7 days of white light in BG-11/HEPES medium. 2.5  $\mu\text{g}$  of proteins were resolved on 10 % (w/v) polyacrylamide gels by SDS-PAGE electrophoresis prior to immunoblotting. Arrowheads indicated OCP or RbcL proteins.

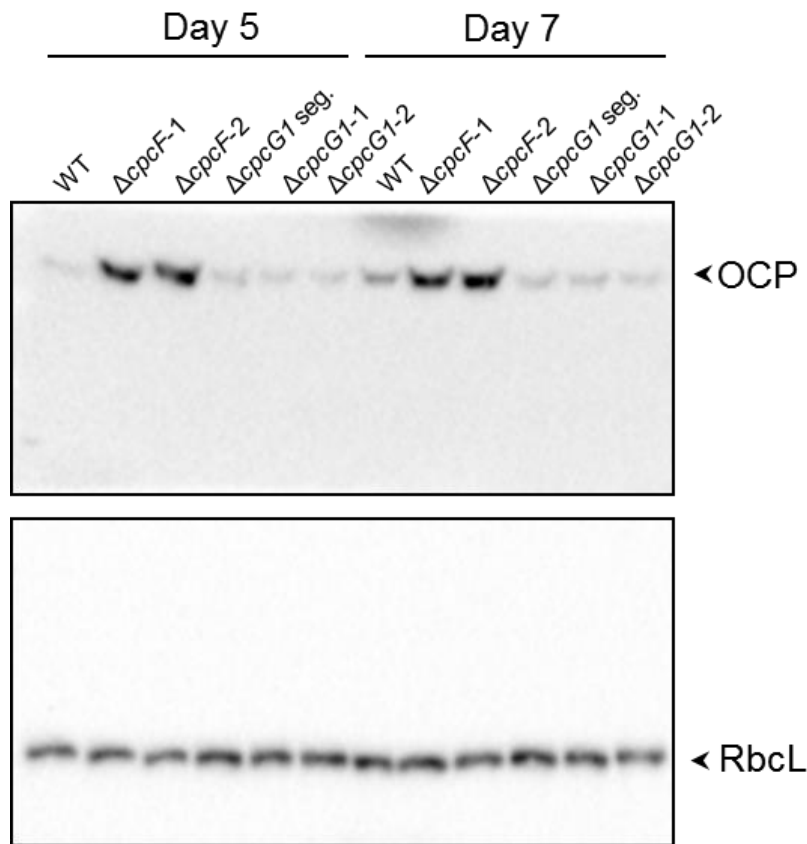

**Supplemental Figure 2.** Growth of *Fremyella diplosiphon*  $\Delta cpcF$  mutants compared to wild-type (WT) and comparative accumulation of OCP protein in *Synechocystis* and *F. diplosiphon*  $\Delta cpcF$  mutants and WT. (A) Liquid culture of the cells grown under  $10 \mu\text{mol m}^{-2} \text{s}^{-1}$  of white light for six days. (B) *F. diplosiphon* WT and  $\Delta cpcF$  strains were grown under  $10 \mu\text{mol m}^{-2} \text{s}^{-1}$  of white light at  $28^\circ\text{C}$  in BG-11/HEPES medium for 3 days. Soluble proteins were extracted using CellLytic B Bacterial Cell Lysis/Extraction reagent (Sigma) with 30 mg of glass beads (Sigma) as previously described (Agostoni et al., 2013). Immunoblot analysis was performed using anti-OCP antibody (top panel; 1:1000 dilution) or anti-RbcL antibody (bottom panel; 1:5000 dilution), with representative blots shown.  $2.5 \mu\text{g}$  of *Synechocystis* and  $30 \mu\text{g}$  of *F. diplosiphon* proteins were resolved on 12% (OCP) or 10% (RbcL) polyacrylamide gels by SDS-PAGE electrophoresis prior to immunoblotting. Arrowheads indicated OCP or RbcL proteins.

A

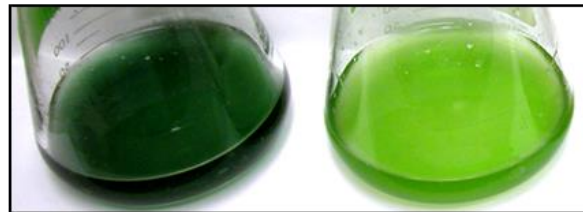

WT

$\Delta cpcF$

*F. diplosiphon*

B

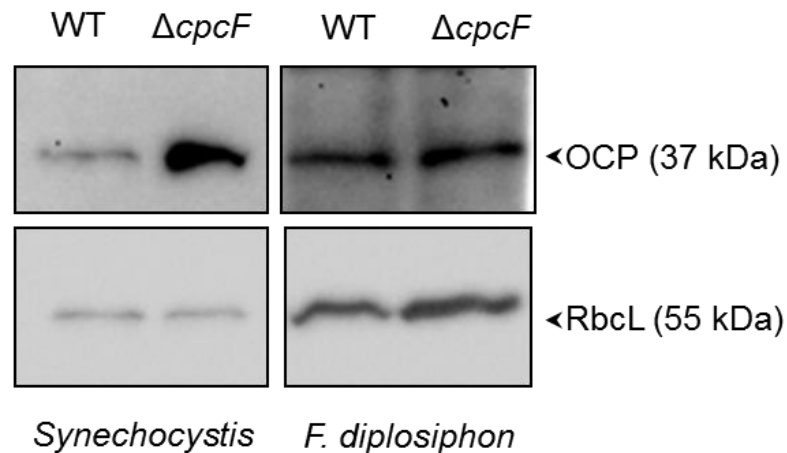

## REFERENCES

**Agostoni, M., Koestler, B. J., Waters, C. M., Williams, B. L., and Montgomery, B. L.** (2013). Occurrence of cyclic di-GMP-modulating output domains in cyanobacteria: An illuminating perspective. *mBio* 4, e00451-13.
